# Supplementary material
Source: PubMed Central journal article supplement (PMC548975)

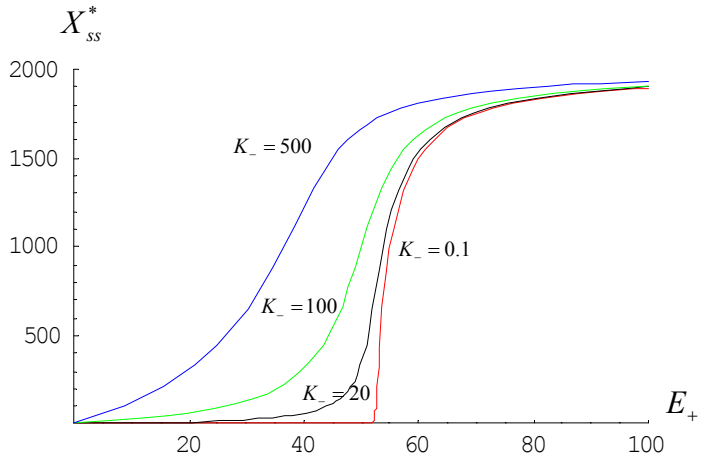

Supplement: pnas_102_7_2310__2.pdf [file pnas_102_7_2310__2.pdf]

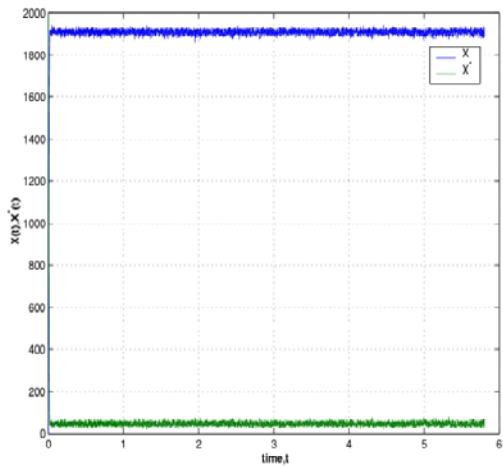

Supplement: pnas_102_7_2310__3.pdf [file pnas_102_7_2310__3.pdf]

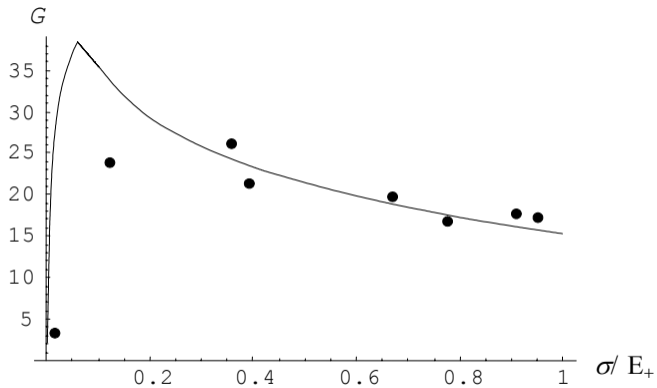

Supplement: pnas_102_7_2310__4.pdf [file pnas_102_7_2310__4.pdf]

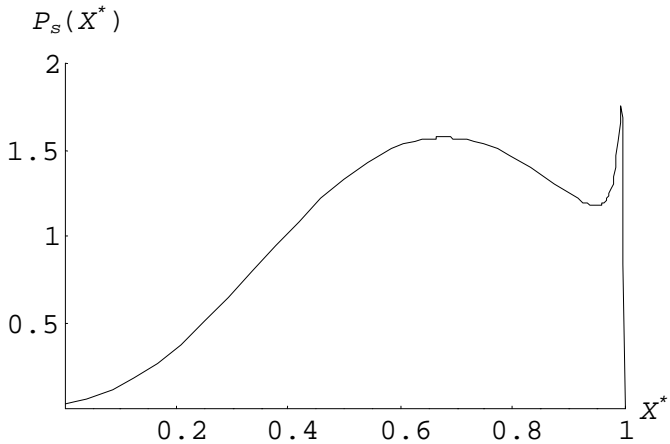

Supplement: pnas_102_7_2310__5.pdf [file pnas_102_7_2310__5.pdf]
